**Large-scale examination of neuropsychiatric, cognitive and cardiovascular  
phenotypic associations with 15q11.2 BP1-BP2 deletion in ~500,000 UK Biobank  
individuals**

Simon G. Williams<sup>1</sup>, Apostol Nakev<sup>1</sup>, Hui Guo<sup>2</sup>, Simon Frain<sup>1</sup>, Gennadiy Tenin<sup>1</sup>,  
Anna Liakhovitskaia<sup>1</sup>, Priyanka Saha<sup>3</sup>, James R. Priest<sup>3</sup>, Kathryn E. Hentges<sup>4</sup>,  
Bernard D. Keavney<sup>1\*</sup>

1. Division of Cardiovascular Sciences, School of Medical Sciences, Faculty of  
Biology, Medicine and Health, Manchester Academic Health Science Centre,  
University of Manchester, Manchester, UK
2. Division of Population Health, Health Services Research and Primary Care,  
School of Health Sciences, Faculty of Biology, Medicine and Health, University  
of Manchester, Manchester, UK
3. Department of Pediatrics, Stanford University, Stanford, CA, USA
4. Division of Evolution and Genomic Sciences, School of Biological Sciences,  
Faculty of Biology, Medicine and Health, University of Manchester, Manchester,  
UK

\* Corresponding author

Email: [bernard.keavney@manchester.ac.uk](mailto:bernard.keavney@manchester.ac.uk) (BDK)

## **Abstract**

### **Background**

Deletion of a non-imprinted 500Kb genomic region at chromosome 15q11.2, between breakpoints 1 and 2 of the Prader-Willi/Angelman locus (BP1-BP2 deletion) has been associated in previous studies with phenotypes including developmental delay, autism, schizophrenia and congenital cardiovascular malformations (CVM). The deletion has a low baseline population prevalence and large-scale data regarding the magnitude of these associations and any milder effects on cognition phenotypes, in populations not selected for disease, are limited.

### **Methods**

Using the UK Biobank (UKB) cohort of ~500,000 individuals, we identified individuals with neuropsychiatric and CVM diagnoses and investigated their association with deletions at the BP1-BP2 locus. In addition we assessed the association of BP1-BP2 deletions with cognitive function and academic achievement in individuals with no previous diagnosis.

### **Results**

Cases of neurodevelopmental and CVM disease had an increased prevalence of the deletion compared to controls (0.68%; OR=1.84 [95% CI 1.23 – 2.75]; p=0.004 and 0.64%; OR=1.73 [95% CI 1.08 – 2.75]; p=0.03 respectively). Excluding participants diagnosed with neurodevelopmental or neuropsychiatric disease, deletion carriers had worse scores in four tests of cognitive function, and while 32.8% of UKB participants without BP1-BP2 deletion had a university or college degree as their highest educational qualification, only 22.8% of deletion carriers achieved this (OR 0.57 [95% CI 0.51-0.64]; p=5.60E-22).

### **Conclusions**

We conclude that BP1-BP2 deletion has an appreciable population prevalence with important life-course impacts on undiagnosed carriers. These data are of potential utility in deciding the circumstances under which clinical testing for BP1-BP2 deletion may be helpful.

### **Key messages**

- Deletions at chromosome 15q11.2 between breakpoints 1 and 2 (BP1-BP2), which encompass four genes, have been associated with developmental delay, autism, schizophrenia and congenital cardiovascular malformations.
- Here, we use the largest cohort studied to date: the UK Biobank cohort of ~500,000 individuals, to explore the association of this deletion with neuropsychiatric and cardiovascular phenotypes as well as its effects on cognitive function and academic achievement.
- We find an appreciable population prevalence of the deletion with these phenotypes and demonstrate reduced cognitive function and lower academic achievements in those individuals with no prior diagnosis.

## Introduction

Copy number variants (CNVs) are a form of genomic structural variation consisting of deletions or duplications of genetic material. These variations may encompass the coding regions of multiple genes. CNVs are known to be common, possibly accounting for as much as 13% of the human genome <sup>1</sup>. Studies have concluded that CNVs which occur commonly in the population are unlikely to contribute significantly to human disease <sup>2</sup>, while in some cases the presence of CNVs may confer a functional advantage <sup>3</sup>. However, many genes are sensitive to copy number and alterations can lead to dosage imbalance <sup>4</sup>. Consequently many rare CNVs have been identified that are associated with a variety of diseases including schizophrenia <sup>5</sup>, <sup>6</sup>, autism <sup>7</sup>, developmental disorders <sup>8,9</sup> and congenital cardiovascular malformations (CVM) <sup>10</sup>.

15q11.2 BP1-BP2 deletions occur between breakpoints 1 and 2 (BP1-BP2) on the long arm of chromosome 15 and encompass 4 genes (*NIPA1*, *NIPA2*, *CYFIP1* and *TUBGCP5*) within a 500kb region (Figure 1). The BP1-BP2 region is immediately adjacent to the imprinted regions of chromosome 15 that cause Prader-Willi and Angelman syndromes, but the four genes within the BP1-BP2 region are not themselves imprinted. Individuals with this microdeletion have increased risk of a range of neuropsychiatric phenotypes including developmental and speech delays <sup>11-13</sup>, autism spectrum disorders <sup>14</sup>, attention deficit disorders (ADD) <sup>15</sup> and schizophrenia <sup>16</sup>. As with other CNVs causing complex phenotypes (for example 22q11.2 deletion, 1q21.1 duplication), penetrance and expressivity shows wide variation. Penetrance of any phenotype with 15q11 BP1-BP2 deletion has been estimated at ~10-12% <sup>11,17</sup> which is relatively low compared to other CNVs

commonly associated with genetic disorders. Taken together, previous studies estimate the prevalence of BP1-BP2 deletion as approximately 0.25% in apparently healthy controls<sup>14</sup>, with individual studies ranging from 0.19% to 0.47% in cohorts of up to 101,655 individuals<sup>11, 16-20</sup>.

Genomic deletions are known to be a significant cause of congenital malformations, among which congenital cardiovascular malformations (CVM) have the highest population prevalence<sup>21-25</sup>. We previously identified twelve heterozygous 15q11.2 BP1-BP2 deletions in a cohort of 2,256 patients with a range of non-syndromic CVM phenotypes, and only 1 in 1,538 controls, inferring association of the deletion with CVM risk (OR = 8.2; p = 0.02)<sup>26</sup>. Other studies have found the deletion over-represented in patients presenting with intellectual disability who also have CVM<sup>11, 15, 27, 28</sup> compared to controls, but data is sparse regarding the association of CVM with this deletion in large populations unselected for disease.

The UK Biobank (UKB), comprising ~500,000 individuals with genotype data, hospital admission records, baseline cognitive function testing, and a variety of other collected information, provides a large-scale resource for investigating complex genotype-phenotype associations. Here we determine the prevalence of BP1-BP2 deletions within the UK Biobank cohort and explore its association with neurodevelopmental diagnoses, cognitive function and CVM.

## Methods

### CNV calling

B-allele frequency (BAF) and log<sub>2</sub>ratio (L2R) transformed intensity value files, generated and made available by UKB using the Applied Biosystems UK BiLEVE Axiom and UK Biobank Axiom arrays (n=488,366), were used to generate CNV calls using the PennCNV software<sup>29</sup>. Samples were grouped for CNV calling in batches of ethnically similar samples based on the ethnicity categories defined by UKB (White, Asian or Asian British, Black or Black British, Chinese, Mixed, Other/Unknown). Ethnically 'white' samples were further batched for CNV calling into batches of 10,000 samples due to the large number of individuals in this category. PennCNV was run using GCmodel adjustment<sup>30</sup> and, following genome-wide CNV calling, samples with waviness factor (WF) less than -0.03 or greater than 0.03 were excluded (n=301). Samples containing an excess of CNVs (>40) (n=1401) were also removed at this stage. This threshold intentionally retained samples with a relatively high number of CNVs as global CNV burden has previously been found to contribute to the risk of sporadic CVM<sup>26</sup>.

15q11.2 deletions were identified where a heterozygous deletion spanned at least 95% of the 4 genes between involved (*NIPA1*, *NIPA2*, *CYFIP1* and *TUBGCP5*) between the outer-most array probes covering this region (chr15:22,819,338-23,093,090; GRCh37).

### Neuropsychiatric classification

The hospital episode statistics (HES) available in the UKB contains information on hospital admissions for the cohort. It includes primary and secondary diagnoses in the

form of ICD9 and ICD10 codes, as well as details of operations and procedures through OPCS-4 codes. Classification of neuropsychiatric conditions was determined using ICD10 codes relating to a subset of ‘mental and behavioural disorders’ (Table S1A) including schizophrenia, bipolar disorders, autism, mental retardation and various neurodevelopmental disorders to classify case individuals. Individuals with any other code in the mental and behavioural classification (Table S1B) were excluded from the control group. This resulted in 3504 case and 483,330 control individuals for neuropsychiatric disorders with CNV calls passing QC thresholds that were then assessed for the presence of BP1-BP2 deletion.

### **Cognitive function**

UKB participants completed a series of cognitive function tests. We correlated performance in these tests with the presence and absence of the BP1-BP2 deletion. Cognitive function in carriers of a range of neurodevelopmental CNVs has been previously assessed in the first release of UKB (~150,000 individuals)<sup>31</sup>. Here, as BP1-BP2 deletions have been shown to associate with developmental delay, autism and behavioural issues previously, and our focus was to investigate the impact of the deletion in people without diagnosed neuropsychiatric conditions, we removed samples from the whole cohort with ICD10 codes present in the HES with specific diagnoses relating to mental and behavioural disorders previously associated with 15q11.2 deletion (Table S1A). In total there were 3,691 samples that matched at least one of these ICD10 codes and were subsequently removed from the cognitive function analysis.

We used results from cognitive function tests where the number of participants was at least 10% of the cohort and the test returned numerical data. Tests for ‘reaction time’, ‘numeric memory’, ‘fluid intelligence’ and ‘pairs matching’ met these criteria with varying amounts of missing data (Table S2). The test for reaction time is based on the card game ‘snap’. A button is pushed by the participant as rapidly as possible when two cards shown on a screen are matching. We used the reported mean time to correctly identify matches over 12 rounds. In the numeric memory test a participant is shown increasingly long numbers (in terms of digits) and asked to recall them after a short period. Here we took the maximum number of digits correctly remembered. In the test for fluid intelligence a participant has 2 minutes to complete as many questions as possible that require logic and reasoning ability, independent of acquired knowledge. The score is the number of correctly answered questions. Finally, the pairs matching test asks participants to memorise the position of matching pairs of cards that are then turned over. We have used the number of incorrect matches in a round as an indication of success in this test.

### **CVM classification**

Using the classification schema shown in Figure 2, ICD9, ICD10, OPCS-4 and self-reported illness and operation codes were used to classify 2792 UK Biobank samples as having CVM and 472,378 samples as controls in a similar protocol to Saha et al.<sup>32</sup>. To ensure that CVM-classified individuals were non-syndromic we excluded a number of syndromes with possible links to cardiovascular defects from the cohort (codes listed in Table S3A). Following this, the initial inclusion criterion for case status was HES evidence of ICD9 or ICD10 codes for ‘congenital malformations of the circulatory system’ (Table S3B). Within these, the ICD10 code Q211 can be used



for both ‘atrial septal defect’ (ASD) and ‘patent foramen ovale’ (PFO). Since PFO is a normal variant found in up to 25% of the population, we carried out further classification to identify and remove PFOs from the case group. Any sample with a PFO-specific operation code (K165) in addition to a Q211 code was classified as PFO. As PFO is often diagnosed during a stroke workup<sup>33</sup> we also used any diagnosis of stroke without atrial fibrillation prior to Q211 diagnosis as an indicator of PFO rather than ASD. This is because ASD is a common cause of atrial fibrillation, which is a risk factor for stroke, whereas PFO (prior to device closure) is not associated with a significantly increased predisposition to atrial fibrillation (all codes in Table S3C). OPCS-4 codes for operations commonly associated with congenital heart defects were also used to classify CVM (Table S3D).

In addition to codes covering ‘congenital malformation of the circulatory system’, we used additional codes to identify, amongst others, certain defects of congenital origin presenting in later life (Table S3E). Chief among these were codes indicating congenital bicuspid aortic valve (BAV), a condition affecting ~1% of males and ~0.33% of females. We included codes for aortic stenosis and aortic insufficiency as well as associated operational codes. We also used self-reported operation and illness codes (full list Table S3F) indicating ‘aortic valve replacement’, ‘aortic stenosis’ and ‘aortic regurgitation’ as evidence of BAV. An age threshold of diagnosis at younger than 65 years was applied to distinguish individuals with aortic valve disease due to BAV from those with age-related degeneration of a trileaflet aortic valve<sup>34</sup>, as previously implemented by Helle et al.<sup>35</sup>. Additional filters were applied to exclude any participants with a diagnosis of other conditions (such as bacterial endocarditis) that might cause non-congenital valve defects. The codes and descriptions of these

exclusion diagnoses are listed in Table S3G. Individuals with no evidence of CVM phenotypes were classified as controls. Other diagnosed conditions that could potentially have a confounding influence on the classification were excluded from the control set (e.g. PFO-categorised samples, acquired heart defects, samples with evidence of aortic valve disease above the specified age threshold). The full list of excluded codes can be found in Table S3H. Finally, deceased UKB participants with or without CVM classifying ICD codes, obtained by UKB from the UK Office for National Statistics, were classified as CVM cases or controls accordingly.

### **Statistical analysis**

The frequency of BP1-BP2 deletion in cases of CVM and controls as well as neuropsychiatric disorder cases and controls was compared using chi-squared tests. Associations between the deletion and quantitative measures of cognitive function were assessed using different statistical models dependent upon the distribution of the data, and adjusting for age and sex. Linear regression was used for reaction time (removing values greater than 5x standard deviation from the mean). Poisson regression was fitted for fluid intelligence score. For the pairs matching test where values are heavily skewed towards zero, values were converted to a binary variable (0(0), 1(>0)) and logistic regression fitted on the binary outcome. Assessment of the numeric memory test was again assessed with logistic regression by converting the values into a binary variable (0( $\leq 6$ ), 1(>6)). Association between the deletion and the highest qualification achieved was assessed by combining 'O levels/GCSEs or equivalent', 'CSEs or equivalent', 'NVQ or HND or HNC or equivalent', 'Other professional qualifications', 'None of the above' and 'Prefer not to answer' into a single category and treating this as a baseline group. Further details on UK specific

qualifications are available at <https://www.gov.uk/what-different-qualification-levels-mean/list-of-qualification-levels>. The highest qualification achieved per individual was assessed in terms of ‘College/University degrees’ or ‘A levels/AS levels or equivalent’ and each of these categories compared to the baseline group by fitting a multinomial log-linear model, accounting for age and sex. Fecundity was assessed in males and females separately using Poisson regression fitted to the number of children fathered and number of live births per person respectively. Outliers were removed if greater than 5x standard deviation from the mean. This excluded samples with >8 children fathered in males and >7 live births in females. An interaction test was performed to confirm the differences between male and female subgroups.

## **Results**

### **The prevalence of BP1-BP2 deletion in neuropsychiatric disorder cases**

We first assessed the prevalence of BP1-BP2 deletion in individuals diagnosed with a neuropsychiatric disorder. 3504 individuals were found to have a relevant diagnosis in the HES data (see Methods). Of these, 24 carried the deletion, a prevalence of 0.68%, which was different from the control group (OR=1.84 [95% CI 1.23 – 2.75];  $p=0.0043$ ) (Table 1). The specific diagnoses of these 24 individuals can be found in Table S4A.

### **BP1-BP2 deletions and cognitive function**

After removing participants with relevant neuropsychiatric disorders (See Methods), 483,330 samples remained. Of these, 1808 carried the BP1-BP2 deletion. Figure 3 shows the differences between the two groups in terms of the scores in 4 different

cognitive function tests. Table 2 summarises the results of these tests and indicates differences in performance between individuals with and without BP1-BP2 deletion, after adjustment for participant age and sex.

### **BP1-BP2 deletions and academic achievement**

Carriers of the BP1-BP2 deletion were compared to non-carriers in terms of the highest academic qualifications that they had achieved. Table 3 shows the number of each cohort with 'College/University degree' and 'A levels/AS levels' as their highest qualification compared to a combined 'Other categories' group. We observed lower proportions of deletion carriers obtaining college/university degrees and Advanced and AS level qualifications (typically taken at age 17-18 and required for university or college entrance). 32.8 % of participants without BP1-BP2 deletion had attained a College/University degree, whereas 22.8% of deletion carriers had done so (OR=0.57 [95% CI 0.51-0.64]; p=5.60E-22). Similarly, a lower proportion of participants with BP1-BP2 deletion had attained A/AS levels as their highest educational qualification than participants without the deletion (OR=0.76 [95% CI 0.65-0.88]; p=4.12E-04).

### **The prevalence of BP1-BP2 deletion in non-syndromic cardiovascular malformation**

In total, 2792 participants with genetic data available were identified as having non-syndromic CVM and 472,378 were classified as controls (See Methods). Table 4 shows a list of the most common CVM diagnoses and associated sample numbers in UKB based upon compiling relevant ICD9, ICD10, OPCS-4 and self-reported codes. A full list of these codes along with diagnoses and associated number of individuals can be found in Table S5. Of the participants with CVM, the most common diagnoses

relate to the presence of bicuspid aortic valve (BAV). We inferred bicuspid aortic valve from any aortic valve diagnosis (aortic stenosis, regurgitation, unspecified problem or replacement) after childhood but before age 65 in the absence of a diagnosis of infective endocarditis (see Methods).

In total, 1832 BP1-BP2 deletions were identified in UKB participants with genotyping data available. The CVM and control groups accounted for a total of 1787 of the samples with BP1-BP2 deletion, with 45 deletions present in participants who were excluded according to the criteria above. Of the 2792 non-syndromic CVM samples, 18 carried the BP1-BP2 deletion resulting in an estimated prevalence of 0.64% (Table 5). The specific phenotypes and classifying codes of these cases are summarised in Table S1B. Of 472,378 control samples, 1769 carried the BP1-BP2 deletion resulting in a prevalence of 0.38% (OR=1.73 [95% CI 1.08 – 2.75];  $p=0.02995$ ). In keeping with previous observations, no participant was homozygous for the BP1-BP2 deletion.

Two of the 18 CVM-case samples carrying the BP1-BP2 deletion were also found to have neuropsychiatric-related diagnoses. Those individuals had cardiovascular diagnoses of atrial septal defect and aortic valve disease/replacement; and neuropsychiatric diagnoses of bipolar disorder and scholastic developmental disorders respectively.

### **BP1-BP2 deletions and fecundity**

Fecundity was assessed in those individuals with and without the BP1-BP2 deletion. Self-reported number of children fathered (for males) and number of live births (for

females) in each cohort is shown in Figure 4. A difference was identified in males between those individuals carrying the BP1-BP2 deletion and those without (mean number of children fathered = 1.66 and 1.8 respectively;  $p=0.00175$ ). This difference was not evident in females (mean number of live births = 1.88 and 1.82 in BP1-BP2 deletion carriers and non-carriers respectively;  $p=0.18$ ). A test for interaction confirmed the differences between the male and female subgroups ( $p$ -interaction= $5.46E-04$ ).

## Discussion

The 15q11.2 (BP1-BP2) deletion (sometimes referred to as the Burnside-Butler syndrome susceptibility locus) has previously been associated with phenotypes including developmental delay, autism, schizophrenia and CVM; the great majority of the evidence regarding the deletion thus far originates from cohorts specifically selected for one or other of those phenotypes. We estimated the prevalence of the deletion and its associations in the UK Biobank cohort. We confirmed the association of the deletion with neuropsychiatric disorders (OR=1.84 [95% CI 1.23 – 2.75];  $p=0.0043$ ); and with CVM (OR=1.73 [95% CI 1.08 – 2.75];  $p=0.03$ ).

Estimates of the prevalence of BP1-BP2 deletion have varied widely in the literature. The largest previous study, by Stefansson et al.<sup>20</sup> showed a general population prevalence of 0.23% (95% CI 0.21-0.26), in 101,655 Icelandic subjects of whom 241 carried the BP1-BP2 deletion. Given differences in recruitment strategies, genotyping methodologies and populations, direct comparison between this figure and our estimate of 0.37% (95% CI 0.36-0.39) is not straightforward; however, they are

broadly consistent with each other. The previous study by Stefansson had also shown nominally reduced fecundity among 172 carriers of the BP1-BP2 deletion who were over 45 years of age. In UKB we observed reduced fecundity in males carrying this deletion ( $p=0.00175$ ) (Figure 4), supporting these findings in a much larger cohort. Stefansson et al. concluded that the neuropsychiatric manifestations of the BP1-BP2 deletion in carriers without schizophrenia were most evident on dyslexia and dyscalculia<sup>20,36</sup>. The present study had a less extensive range of cognitive function tests, but with larger numbers of deletion carriers we observed a more general effect on cognitive function among carriers who had not been diagnosed with a neuropsychiatric disorder. Additionally, we showed sizeable associations between the deletion and lower educational attainment. Deletion carriers were considerably less likely to obtain Advanced level qualifications, which in the UK system are required for University entrance; and whereas about one-third of UKB participants without BP1-BP2 deletion had a University or College degree, less than one-quarter of deletion carriers had this as their highest educational qualification.

We confirmed the association of BP1-BP2 deletion with CVM, which has been observed in some but not all previous studies. The first study linking BP1-BP2 deletions with non-syndromic CVM showed an odds ratio of 8.2 ( $P=0.02$ ); the risk associated with the deletion was much smaller in this study. Of note, there are major differences in the range of phenotypes in both studies, with a much milder range of CVM phenotypes predominating in UKB. Indeed, CVM phenotypes occurred at lower rates than anticipated in UKB, which is known to exhibit a “healthy cohort effect” in multiple domains. Most UKB participants with CVMs had bicuspid aortic valve, which was excluded from the hypothesis-generating study; moreover, the

prevalence of BAV diagnosed from the HES data in UKB was significantly lower than anticipated, indicating misclassification bias could affect the risk estimate.

Larger cohorts of homogeneous phenotypes will be required in order to establish the role of the deletion in specific CVM phenotypes. In future studies, availability of electronic health records from the General Practitioners of UKB participants, may mitigate any misclassification bias in respect of CVMs.

The clinical and genetic aspects of BP1-BP2 deletion have been recently reviewed <sup>37</sup>. Four genes, *TUBGCP5*, *CYFIP1*, *NIPA1*, and *NIPA2*, are located in the deleted region. The deletion is recognised as a susceptibility locus for presentations with intellectual impairment, autism, schizophrenia, and epilepsy with a low penetrance estimated at around 10%. The effects of hemizyosity at each individual gene in the region have not been systematically described in mouse models, nor has any mouse model of the entire deletion been reported as yet. Therefore, the mechanisms whereby the deletion causes its associated phenotypes, and the interaction between hemizyosity for the region and other genetic and environmental factors to result in the wide variety of phenotypes described, remain to be elucidated.

In conclusion, we have explored the phenotypic associations of the BP1-BP2 deletion in the largest cohort studied to date. We demonstrate an association with the less severe CVM phenotypes prevalent in the UKB cohort, albeit of small magnitude, as well as confirming the association with neuropsychiatric disorders. We have found broad general effects on cognitive function in carriers of the deletion and evidence of disparity in academic qualifications that have been achieved by carriers compared to non-carriers. Given reduced cognitive function in non-diagnosed carriers, these



findings highlight important clinical and societal implications of the BP1-BP2 deletion, and are of potential use in deciding appropriate criteria for clinical genetic testing.

**Conflict of Interest:** none declared

## References

1. Stankiewicz P, Lupski JR. Structural variation in the human genome and its role in disease. *Annu Rev Med* 2010; **61**: 437-55.
2. Wellcome Trust Case Control C, Craddock N, Hurles ME, et al. Genome-wide association study of CNVs in 16,000 cases of eight common diseases and 3,000 shared controls. *Nature* 2010; **464**: 713-20.
3. O'Huallachain M, Karczewski KJ, Weissman SM, Urban AE, Snyder MP. Extensive genetic variation in somatic human tissues. *Proc Natl Acad Sci U S A* 2012; **109**: 18018-23.
4. Huang N, Lee I, Marcotte EM, Hurles ME. Characterising and predicting haploinsufficiency in the human genome. *PLoS Genet* 2010; **6**: e1001154.
5. International Schizophrenia C. Rare chromosomal deletions and duplications increase risk of schizophrenia. *Nature* 2008; **455**: 237-41.
6. Xu B, Roos JL, Levy S, van Rensburg EJ, Gogos JA, Karayiorgou M. Strong association of de novo copy number mutations with sporadic schizophrenia. *Nat Genet* 2008; **40**: 880-5.
7. Pinto D, Pagnamenta AT, Klei L, et al. Functional impact of global rare copy number variation in autism spectrum disorders. *Nature* 2010; **466**: 368-72.
8. Large-scale discovery of novel genetic causes of developmental disorders.
9. Deciphering Developmental Disorders S. Large-scale discovery of novel genetic causes of developmental disorders. *Nature* 2015; **519**: 223-8.
10. Costain G, Silversides CK, Bassett AS. The importance of copy number variation in congenital heart disease. *NPJ Genom Med* 2016; **1**: 16031.
11. Cooper GM, Coe BP, Girirajan S, et al. A copy number variation morbidity map of developmental delay. *Nat Genet* 2011; **43**: 838-46.
12. von der Lippe C, Rustad C, Heimdal K, Rodningen OK. 15q11.2 microdeletion - seven new patients with delayed development and/or behavioural problems. *Eur J Med Genet* 2011; **54**: 357-60.
13. Burnside RD, Pasion R, Mikhail FM, et al. Microdeletion/microduplication of proximal 15q11.2 between BP1 and BP2: a susceptibility region for neurological dysfunction including developmental and language delay. *Hum Genet* 2011; **130**: 517-28.
14. Cafferkey M, Ahn JW, Flinter F, Ogilvie C. Phenotypic features in patients with 15q11.2(BP1-BP2) deletion: further delineation of an emerging syndrome. *Am J Med Genet A* 2014; **164A**: 1916-22.
15. Doornbos M, Sikkema-Raddatz B, Ruijvenkamp CA, et al. Nine patients with a microdeletion 15q11.2 between breakpoints 1 and 2 of the Prader-Willi critical region, possibly associated with behavioural disturbances. *Eur J Med Genet* 2009; **52**: 108-15.
16. Stefansson H, Rujescu D, Cichon S, et al. Large recurrent microdeletions associated with schizophrenia. *Nature* 2008; **455**: 232-6.
17. Rosenfeld JA, Coe BP, Eichler EE, Cuckle H, Shaffer LG. Estimates of penetrance for recurrent pathogenic copy-number variations. *Genet Med* 2013; **15**: 478-81.
18. de Kovel CG, Trucks H, Helbig I, et al. Recurrent microdeletions at 15q11.2 and 16p13.11 predispose to idiopathic generalized epilepsies. *Brain* 2010; **133**: 23-32.
19. Itsara A, Cooper GM, Baker C, et al. Population analysis of large copy number variants and hotspots of human genetic disease. *Am J Hum Genet* 2009; **84**: 148-61.
20. Stefansson H, Meyer-Lindenberg A, Steinberg S, et al. CNVs conferring risk of autism or schizophrenia affect cognition in controls. *Nature* 2014; **505**: 361-6.

21. Carey AS, Liang L, Edwards J, et al. Effect of copy number variants on outcomes for infants with single ventricle heart defects. *Circ Cardiovasc Genet* 2013; **6**: 444-51.
22. Connor JA, Hinton RB, Miller EM, Sund KL, Ruschman JG, Ware SM. Genetic testing practices in infants with congenital heart disease. *Congenit Heart Dis* 2014; **9**: 158-67.
23. Silversides CK, Lionel AC, Costain G, et al. Rare copy number variations in adults with tetralogy of Fallot implicate novel risk gene pathways. *PLoS Genet* 2012; **8**: e1002843.
24. Sinha T, Li D, Theveniau-Ruissy M, Hutson MR, Kelly RG, Wang J. Loss of Wnt5a disrupts second heart field cell deployment and may contribute to OFT malformations in DiGeorge syndrome. *Hum Mol Genet* 2015; **24**: 1704-16.
25. Tomita-Mitchell A, Mahnke DK, Struble CA, et al. Human gene copy number spectra analysis in congenital heart malformations. *Physiol Genomics* 2012; **44**: 518-41.
26. Soemedi R, Wilson IJ, Bentham J, et al. Contribution of global rare copy-number variants to the risk of sporadic congenital heart disease. *Am J Hum Genet* 2012; **91**: 489-501.
27. Kerstjens-Frederikse WS, Du Marchie Sarvaas GJ, Ruiters JS, et al. Left ventricular outflow tract obstruction: should cardiac screening be offered to first-degree relatives? *Heart* 2011; **97**: 1228-32.
28. Vanlerberghe C, Petit F, Malan V, et al. 15q11.2 microdeletion (BP1-BP2) and developmental delay, behaviour issues, epilepsy and congenital heart disease: a series of 52 patients. *Eur J Med Genet* 2015; **58**: 140-7.
29. Wang K, Li M, Hadley D, et al. PennCNV: an integrated hidden Markov model designed for high-resolution copy number variation detection in whole-genome SNP genotyping data. *Genome Res* 2007; **17**: 1665-74.
30. Diskin SJ, Li M, Hou C, et al. Adjustment of genomic waves in signal intensities from whole-genome SNP genotyping platforms. *Nucleic Acids Res* 2008; **36**: e126.
31. Kendall KM, Rees E, Escott-Price V, et al. Cognitive Performance Among Carriers of Pathogenic Copy Number Variants: Analysis of 152,000 UK Biobank Subjects. *Biol Psychiatry* 2017; **82**: 103-10.
32. Saha P, Potiny P, Rigdon J, et al. Substantial Cardiovascular Morbidity in Adults With Lower-Complexity Congenital Heart Disease. *Circulation* 2019; **139**: 1889-99.
33. Lanz J, Brophy JM, Therrien J, Kaouache M, Guo L, Marelli AJ. Stroke in Adults With Congenital Heart Disease: Incidence, Cumulative Risk, and Predictors. *Circulation* 2015; **132**: 2385-94.
34. Roberts WC, Ko JM. Frequency by decades of unicuspid, bicuspid, and tricuspid aortic valves in adults having isolated aortic valve replacement for aortic stenosis, with or without associated aortic regurgitation. *Circulation* 2005; **111**: 920-5.
35. Helle E, Cordova-Palomera A, Ojala T, et al. Loss of function, missense, and intronic variants in NOTCH1 confer different risks for left ventricular outflow tract obstructive heart defects in two European cohorts. *Genet Epidemiol* 2018.
36. Ulfarsson MO, Walters GB, Gustafsson O, et al. 15q11.2 CNV affects cognitive, structural and functional correlates of dyslexia and dyscalculia. *Transl Psychiatry* 2017; **7**: e1109.
37. Butler MG. Clinical and genetic aspects of the 15q11.2 BP1-BP2 microdeletion disorder. *J Intellect Disabil Res* 2017; **61**: 568-79.



## Tables

|                               | BP1-BP2 del | No BP1-BP2 del | Prevalence |
|-------------------------------|-------------|----------------|------------|
| Non-neuropsychiatric controls | 1808        | 481522         | 0.37%      |
| Neuropsychiatric cases        | 24          | 3480           | 0.68%      |

**Table 1. The number and prevalence of BP1-BP2 deletions in neuropsychiatric cases compared to controls in UK Biobank.**

| Test                         | BP1-BP2 del |        |        |       | No BP1-BP2 del |        |        |       | p value  |
|------------------------------|-------------|--------|--------|-------|----------------|--------|--------|-------|----------|
|                              | N           | Mean   | Median | SE    | N              | Mean   | Median | SE    |          |
| Reaction time (milliseconds) | 1781        | 574.60 | 551.0  | 2.789 | 475318         | 556.80 | 536.0  | 0.160 | 1.38E-13 |
| Fluid intelligence score     | 556         | 5.40   | 5.0    | 0.080 | 158373         | 5.99   | 6.0    | 0.005 | 8.02E-09 |
| Numeric memory               | 188         | 6.07   | 6.0    | 0.140 | 50158          | 6.48   | 7.0    | 0.008 | 9.00E-06 |
| Pairs matching               | 1808        | 0.61   | 0.0    | 0.030 | 480590         | 0.54   | 0.0    | 0.002 | 2.59E-03 |

**Table 2. Summary of the cognitive function tests in the BP1-BP2 deletion group and non-carriers.**

| Highest qualification achieved | BP1-BP2 deletion | No BP1-BP2 deletion | odds | p value  |
|--------------------------------|------------------|---------------------|------|----------|
|                                | frequency        | frequency           |      |          |
| College/University degree      | 414              | 157988              | 0.57 | 5.60E-22 |
| A levels/AS levels             | 185              | 54077               | 0.76 | 4.12E-04 |
| Other categories               | 1209             | 268962              | -    | -        |

**Table 3. Academic qualifications achieved by carriers of BP1-BP2 deletion in comparison with non-carriers.** ‘College/University degree’ and ‘A levels/AS levels’ highest qualification attainment groups are each compared with a combined ‘Other categories’ group. Estimated odds ratios reflect the chance of the BP1-BP2 deletion group achieving the qualification compared to non-carriers.

**Table 4. The most common CVM diagnoses in UK Biobank.**

| <b>CVM diagnosis</b>                         | <b>Cases</b> |
|----------------------------------------------|--------------|
| Aortic valve replacement (<65 years)         | 896          |
| Aortic stenosis (<65 years)                  | 841          |
| Aortic insufficiency (<65 years)             | 594          |
| Atrial septal defect                         | 409          |
| Malformation of vascular system              | 369          |
| Heart surgery (<18 years)                    | 212          |
| Congenital heart disease - unspecified       | 110          |
| Ventricular septal defect                    | 95           |
| Cardiac septum defect - unspecified          | 90           |
| Pulmonary insufficiency                      | 50           |
| Pulmonary stenosis                           | 45           |
| Aortic valve issue - unspecified (<65 years) | 36           |
| Coarctation of aorta                         | 30           |
| Pulmonary artery issue - unspecified         | 29           |
| Patent ductus arteriosus                     | 28           |
| Aortic defect - unspecified                  | 23           |
| Dextrocardia                                 | 19           |
| Heart block                                  | 17           |
| Tetralogy of Fallot                          | 17           |
| Aortic atresia                               | 13           |



|                                      | <b>BP1-BP2 del</b> | <b>No BP1-BP2 del</b> | <b>Prevalence</b> |
|--------------------------------------|--------------------|-----------------------|-------------------|
| <b>Non-CVM controls</b>              | 1769               | 470609                | 0.38%             |
| <b>All non-syndromic CVM samples</b> | 18                 | 2774                  | 0.64%             |

**Table 5. The number and prevalence of BP1-BP2 deletions in non-syndromic CVM cases compared to controls in UK Biobank.**

## Figure Legends

**Figure 1.** Ideogram of chromosome 15 showing the location of 15q11.2 and the genes between BP1 and BP2.

**Figure 2.** The CVM and control sample classification process on UK Biobank samples using a combination of codes relating to HES data and self-reported information with appropriate thresholds and filtering. Specific codes for each classification step can be found in Table S3.

**Figure 3.** Cognitive function test differences between individuals carrying a 15q11.2 deletion and those without. **A.** Reaction time test. **B.** Fluid intelligence score. **C.** Numeric memory test. **D.** Pairs matching test.

**Figure 4.** Fecundity measured as self-reported number of children fathered (by males) and number of live births (by females) in individuals with and without the BP1-BP2 deletion.

## Supplementary material

**Table S1.** **A.** List of ICD10 codes used to classify individuals as having had phenotypically relevant neuropsychiatric disorders. **B.** Additional ICD10 codes for ‘mental or behavioural disorders’ that were used to exclude individuals from the control group for neuropsychiatric disorders.

**Table S2.** Amount of ‘missing’ data in the cognitive function tests.

**Table S3.** Lists of ICD9, ICD10 and OPCS4 codes used as inclusion and exclusion criteria for classifying the UK Biobank cohort as non-syndromic CVM samples or controls.

**Table S4.** Phenotypes of UK Biobank participants classified as having **A.** neuropsychiatric diagnoses and a BP1-BP2 deletion. **B.** CVM diagnoses and a BP-BP2 deletion.

**Table S5.** A list of CVM-classifying codes and the number of samples in UK Biobank with these classifications.

Chromosome 15

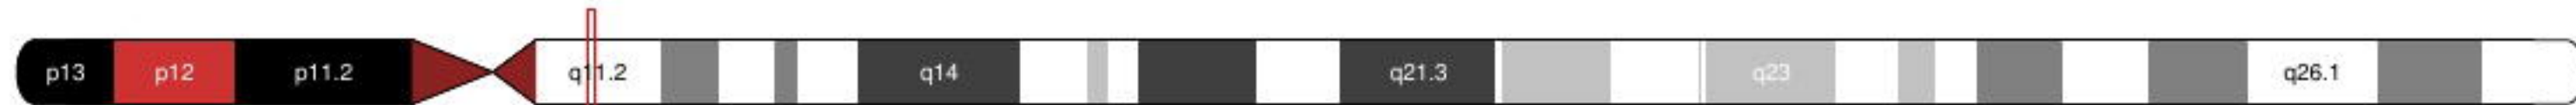

22.85 mb

22.95 mb

23.05 mb

22.9 mb

23 mb

TUBGCP5

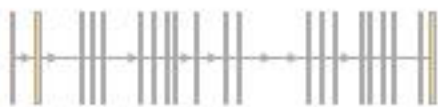

CYFIP1

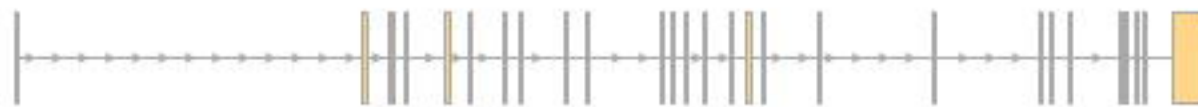

NIPA1

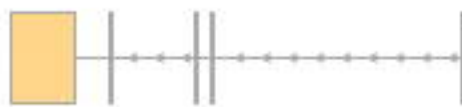

NIPA2

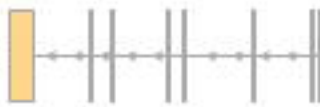

Genes

UK Biobank samples with CNV calls passing QC (n=486,835)

Exclude samples with genetic syndromes or other confounding conditions (Table S3A)

ICD9/10 codes -  
"Congenital  
malformations of  
the circulatory  
system" - Table S3B

ASD or PFO?  
(Table S3C)

OPCS codes -  
Classification of  
Interventions and  
Procedures  
(Table S3D)

Additional  
ICD9/10/OPCS-4  
codes - conditional  
(Table S3E)

Self-reported codes  
linked to CVM -  
conditional (Table  
S3F)

Cause of death  
(ICD10 codes from  
Tables S3B&E)

No evidence of  
CVM

match specific ICD9/10  
code?

match ASD/PFO codes?

match specific OPCS-4  
codes?

match specific  
ICD9/10/OPCS-4  
code?

match a specific self-  
reported code?

match specific ICD10  
code?

Failure to match any  
CVM-related codes

Y

Y

Y

Y

Y

Y

Y

contains PFO-specific OPCS code

Y

N

evidence of stroke pre-  
Q211 event?

Y

N

evidence of atrial  
fibrillation pre-stroke

N

Y

PFO

ASD

HES episode start  
date under age  
threshold?

Y

operation/illness under  
age threshold?

Y

Exclude samples with other specific diseases (Table S3G)

Where appropriate, is age of  
death under age threshold?

Y

Exclude samples with specific  
heart-related conditions (Table  
S3H)

CVM samples (n=2,792)

control samples (n=472,378)

group 15q11.2 deletion No 15q11.2 deletion

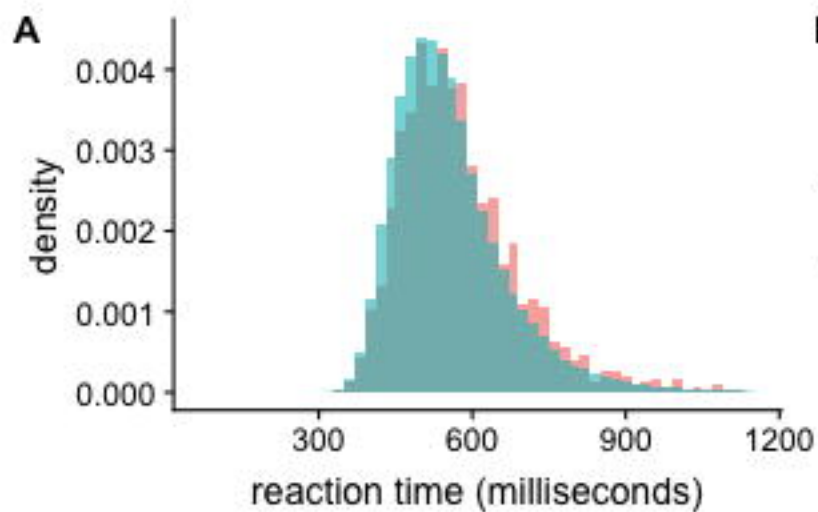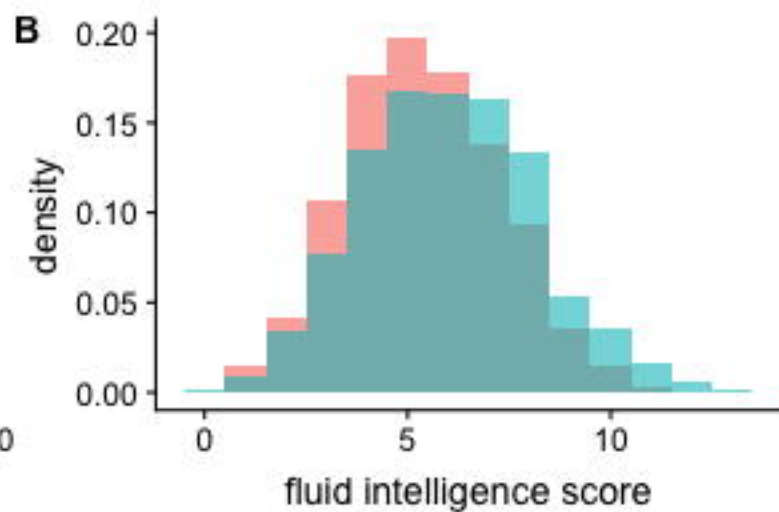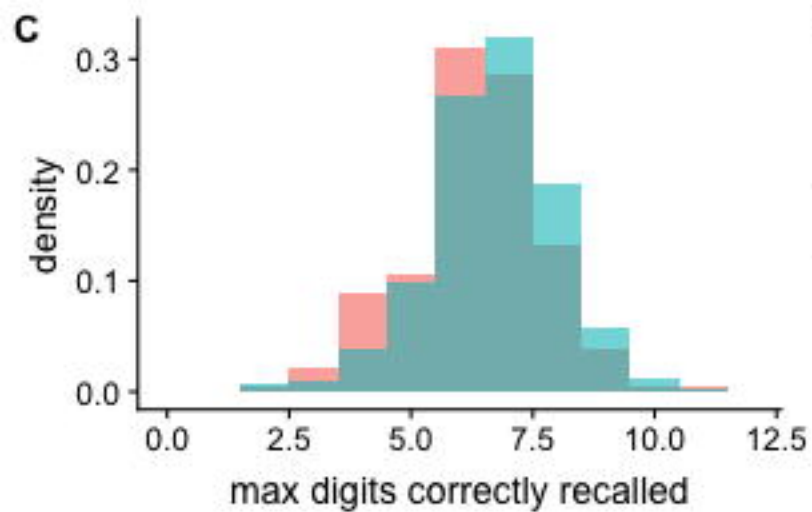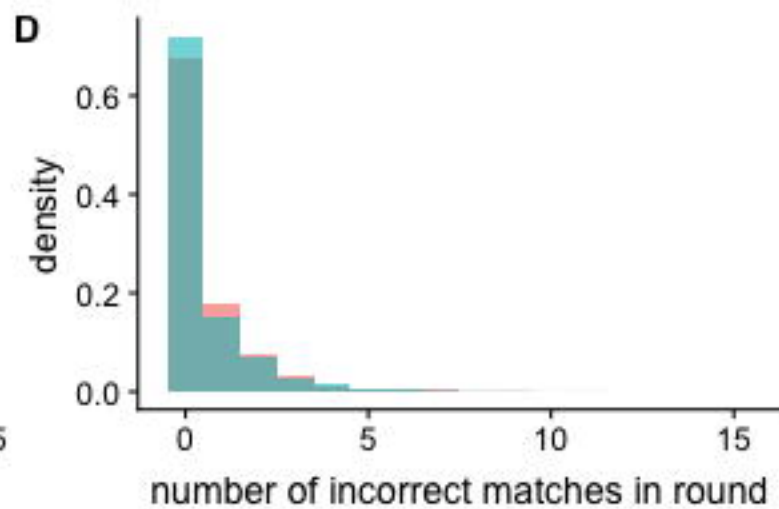

group 15q11.2 deletion No 15q11.2 deletion

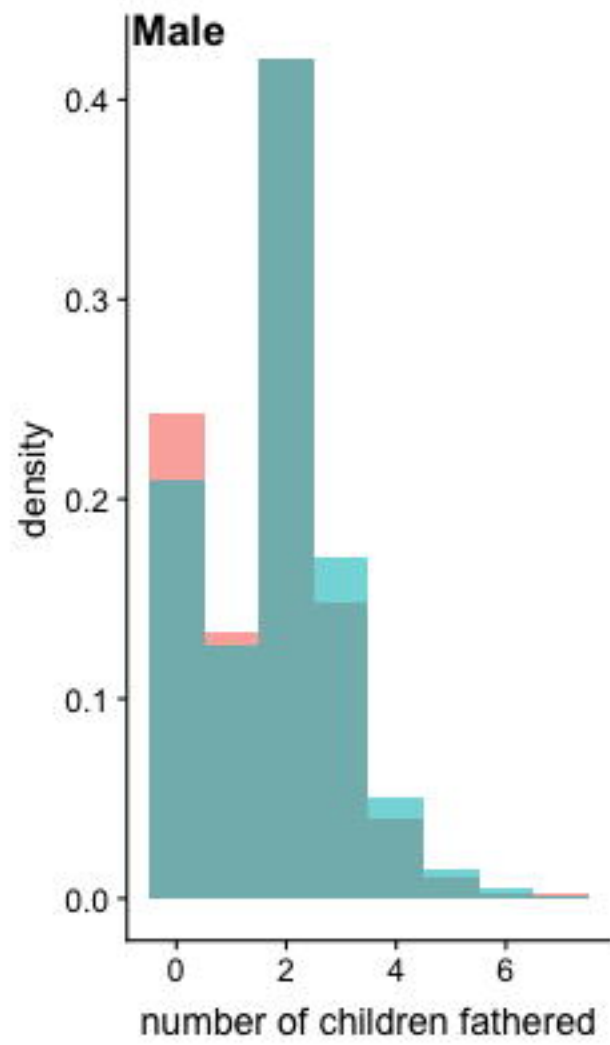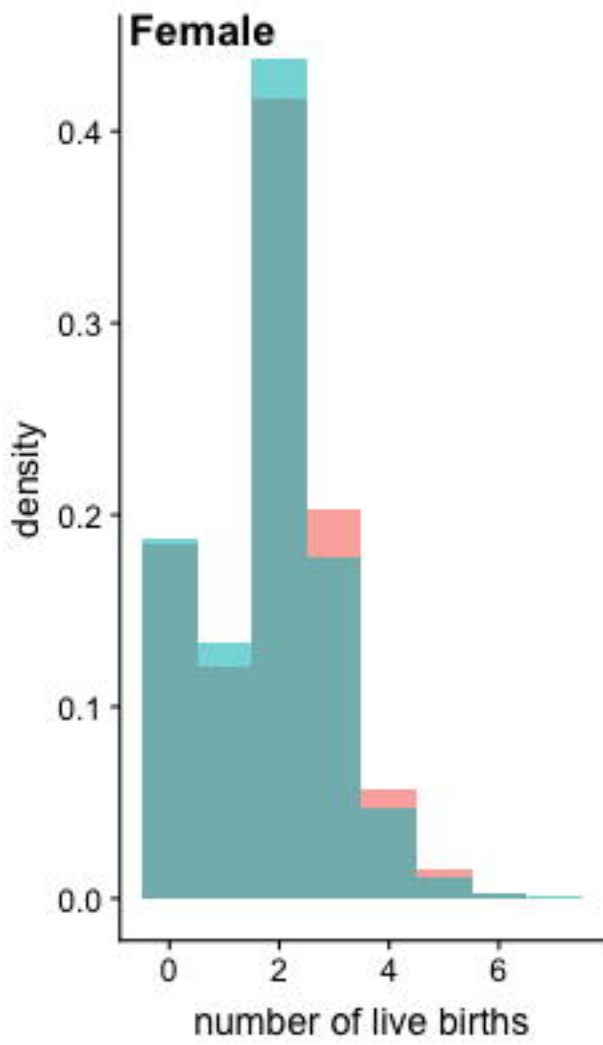

Source: https://biorxiv.org/content/biorxiv/early/2019/08/01/722504.full-text.pdf
